# Supplementary material for: miR-146a suppresses cellular immune response during Japanese encephalitis virus JaOArS982 strain infection in human microglial cells
Source: Springer Nature journal article supplement (doi:10.1186/s12974-015-0249-0), 2015-02-17

**Supplementary fig-1 : JEV P20778 Strain downregulates miR-146a and effect of miR-146a on P20778 replication.**

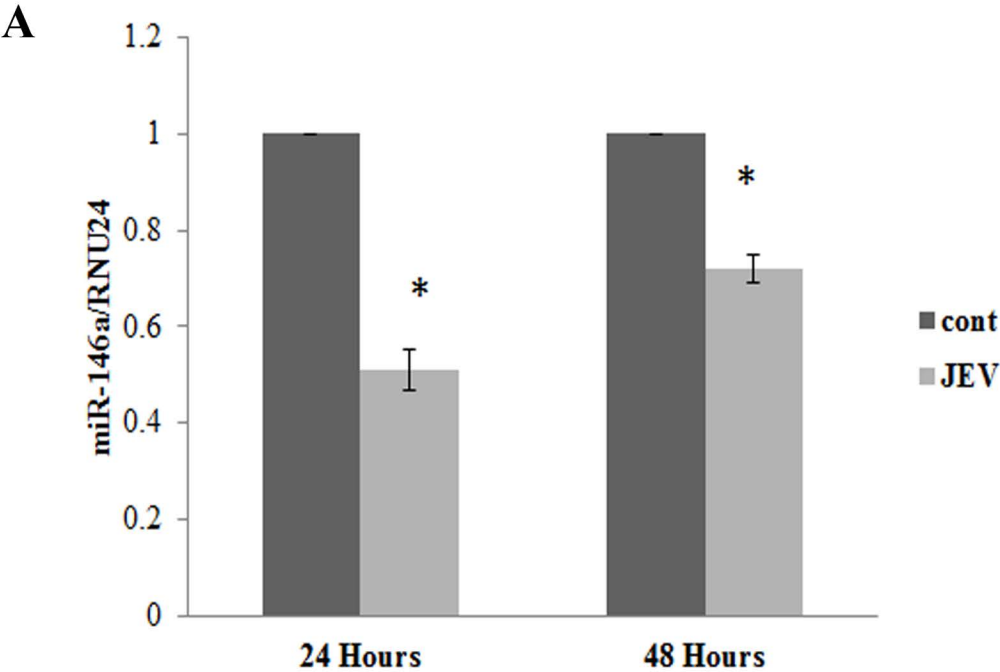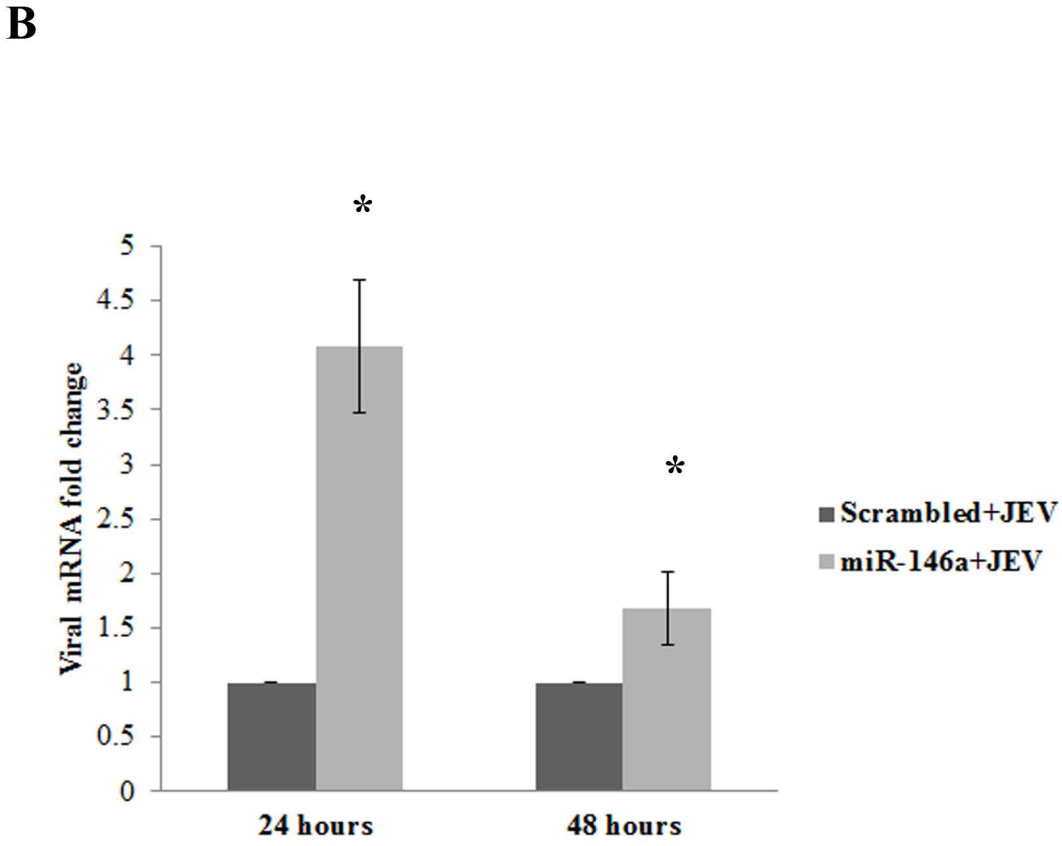

Supplement: MOESM1 [file 9768554]
