# Supplementary material for: miR-146a suppresses cellular immune response during Japanese encephalitis virus JaOArS982 strain infection in human microglial cells
Source: Springer Nature journal article supplement (doi:10.1186/s12974-015-0249-0), 2015-02-17

## Supplementary fig-2: miR-146a suppresses cytokine expression

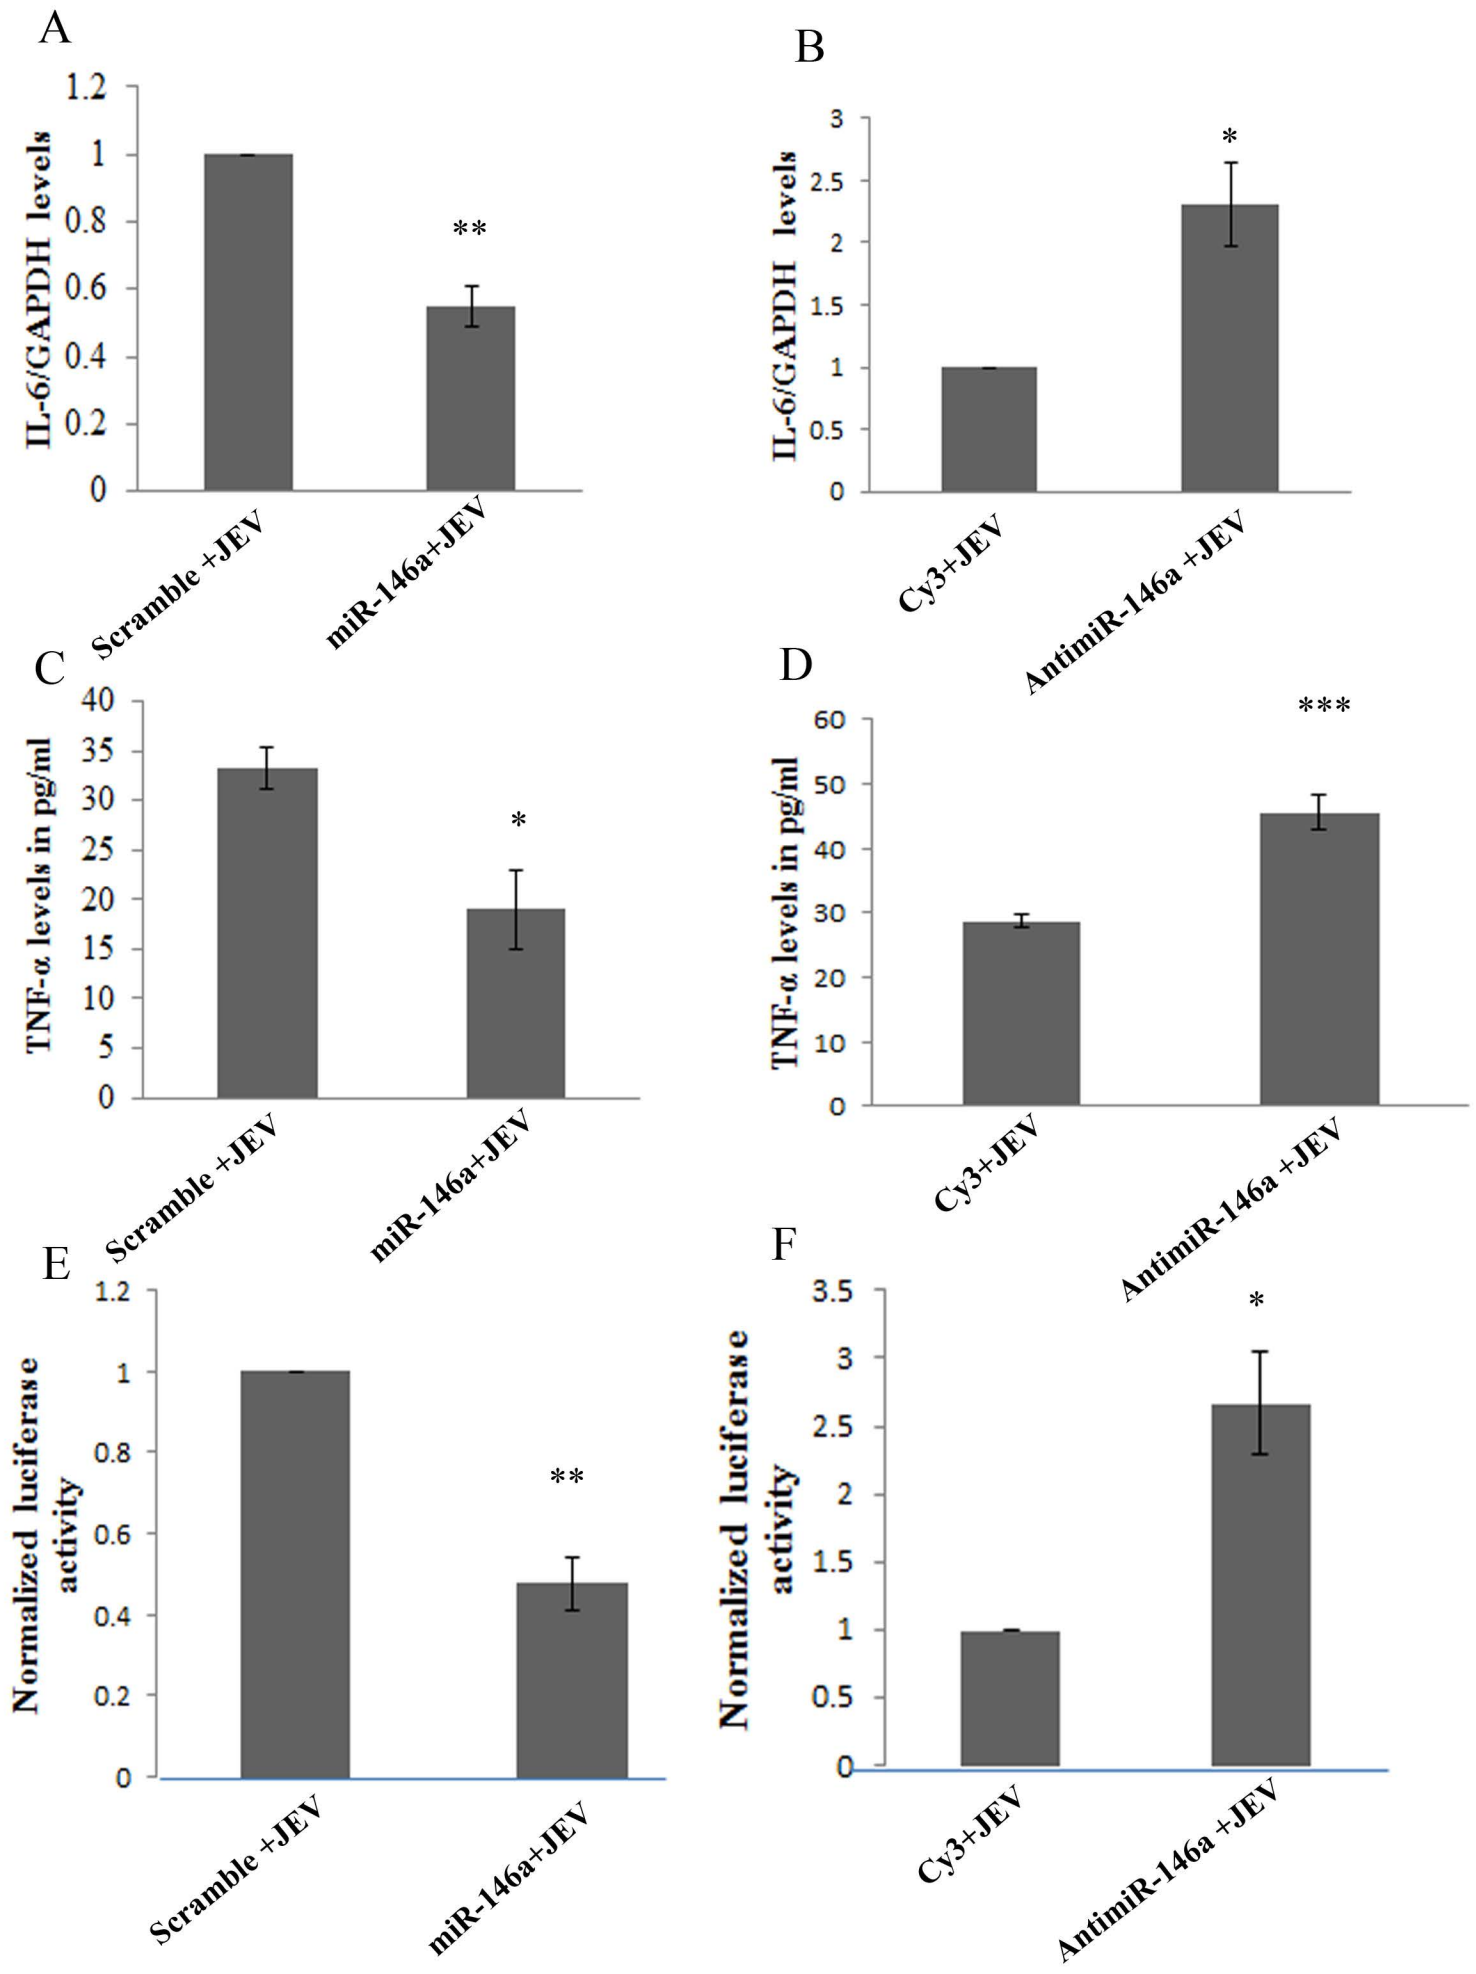

Supplement: MOESM2 [file 9768554]
